# Supplementary material for: Synthesis of dopamine-mediated Cu nanoclusters for sensing and fluorescent coding
Source: Royal Society of Chemistry journal article supplement (doi:10.1039/c5ay02494c), 2015-11-25
Supplement: c5ay02494c1.pdf [file c5ay02494c1.pdf]

## Electronic Supplementary Material

*For*

### Synthesis of dopamine-mediated Cu nanoclusters for sensing and fluorescent coding

Lan Wang, Hong Miao, Dan Zhong, Xiaoming Yang\*

*College of Pharmaceutical Sciences, Key Laboratory of Luminescence and Real-Time Analytical Chemistry (Southwest University), Ministry of Education, Southwest University, Chongqing 400715, China*

#### Figures

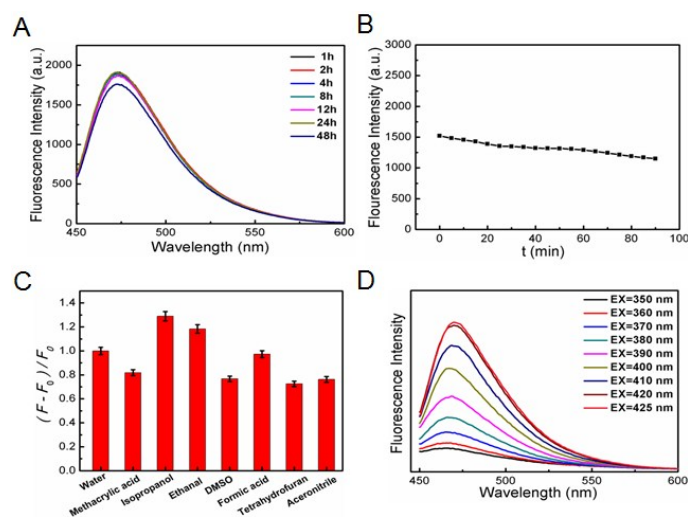

**Fig. S1** (A) Fluorescence intensity of CuNCs exposed to UV light for different hours; (B) Time-dependence of fluorescence intensity at 480 nm ( $\lambda_{ex}=425$  nm) of CuNCs; (C) Emission spectra of CuNCs for varying excitation wavelengths; (D) Effect of different organic solvents on CuNCs ( $F$  represented the fluorescence intensity of the CuNCs in various of organic solvents, and  $F_0$  as CuNCs in water).

\* To whom correspondence should be addressed. Tel: 86-23-68251225; Fax: 86-23-68251225; E-mail: [ming4444@swu.edu.cn](mailto:ming4444@swu.edu.cn)

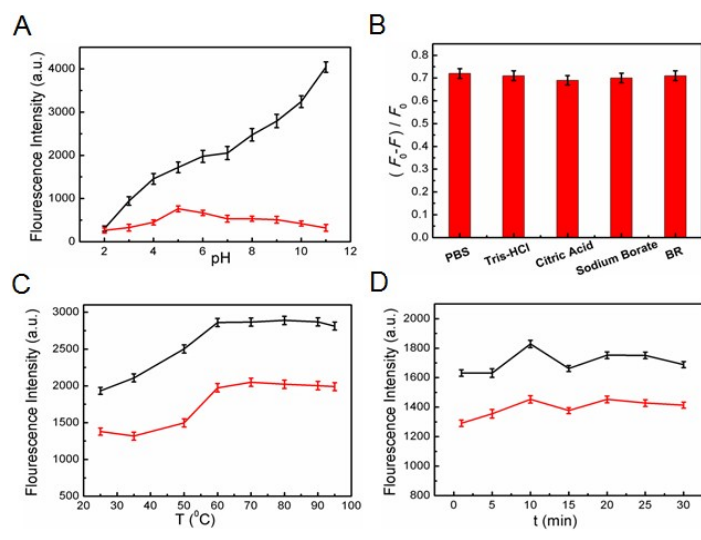

**Fig. S2** (A) Influence of pH on the fluorescence intensities of CuNCs in the absence (black) and presence (red) of TC; (B) The  $(F_0 - F) / F_0$  values in five different buffers ( $F_0$  and  $F$  represent the fluorescence intensities of CuNCs in the absence and presence of TC, respectively); (C, D) Optimization of incubation temperature (25  $^{\circ}\text{C}$ , 35  $^{\circ}\text{C}$ , 45  $^{\circ}\text{C}$ , 55  $^{\circ}\text{C}$ , 65  $^{\circ}\text{C}$ , 75  $^{\circ}\text{C}$ , 85  $^{\circ}\text{C}$ , 98  $^{\circ}\text{C}$ ) and time (5 min, 10 min, 15 min, 20 min, 30 min) for detection of TC successively.

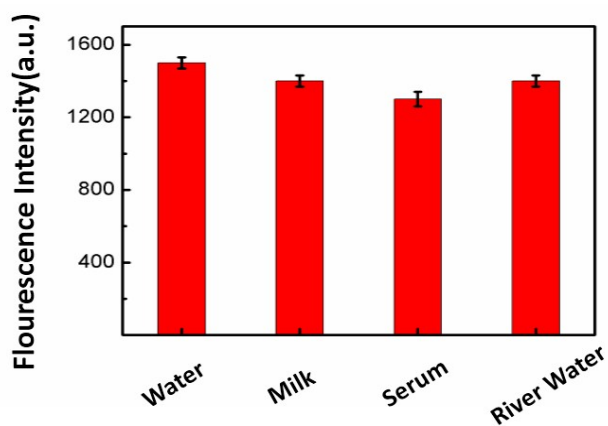

**Fig. S3** The stability of CuNCs for real samples

**Table S1** Zeta potentials of CuNCs in the presence and absence of TC

| Samples   | CuNCs       | CuNCs+TC    |
|-----------|-------------|-------------|
| Zeta / mV | -36.31±2.14 | -31.23±1.98 |
